# Supplementary material for: Anaerobic fermentation of hybrid Pennisetum mixed with fruit and vegetable wastes to produce volatile fatty acids
Source: Royal Society of Chemistry journal article supplement (doi:10.1039/d0ra04400h), 2020-01-01
Supplement: d0ra04400h1.pdf [file d0ra04400h1.pdf]

**Table S1 Data of TVFA concentration**

| Test                 |      | TVFA concentration (g/L) |      |      |       |       |       |
|----------------------|------|--------------------------|------|------|-------|-------|-------|
|                      |      | D1                       | D2   | D3   | D5    | D10   | D15   |
| pH <sub>in</sub> =6  | R1-A | 2.16                     | 2.52 | 2.13 | 1.96  | 4.95  | 4.98  |
|                      | R1-B | 1.90                     | 2.36 | 2.07 | 2.39  | 4.96  | 5.30  |
|                      | R2-A | 2.45                     | 3.43 | 3.41 | 3.41  | 4.06  | 2.53  |
|                      | R2-B | 2.11                     | 3.03 | 3.34 | 3.81  | 3.45  | 2.57  |
|                      | R3-A | 2.40                     | 3.92 | 3.89 | 4.56  | 4.15  | 4.18  |
|                      | R3-B | 2.12                     | 3.63 | 3.92 | 4.22  | 4.55  | 3.58  |
|                      | R4-A | 3.51                     | 5.79 | 6.82 | 7.60  | 7.18  | 5.96  |
|                      | R4-B | 3.21                     | 6.09 | 6.60 | 7.27  | 7.35  | 6.41  |
| pH <sub>in</sub> =11 | R1-A | 2.65                     | 3.58 | 3.02 | 5.08  | 6.01  | 10.99 |
|                      | R1-B | 2.40                     | 3.01 | 2.96 | 4.48  | 5.87  | 10.21 |
|                      | R2-A | 0.75                     | 3.94 | 4.53 | 5.33  | 5.88  | 7.01  |
|                      | R2-B | 0.64                     | 3.73 | 4.37 | 4.78  | 5.49  | 7.15  |
|                      | R3-A | 0.66                     | 4.01 | 5.14 | 6.71  | 8.54  | 2.56  |
|                      | R3-B | 0.52                     | 3.85 | 4.60 | 6.53  | 8.03  | 4.50  |
|                      | R4-A | 0.38                     | 6.44 | 8.30 | 11.00 | 10.87 | 1.15  |
|                      | R4-B | 0.76                     | 5.84 | 8.30 | 11.26 | 10.21 | 0.71  |
| BES                  | R1-A | 3.49                     | 4.39 | 4.85 | 4.83  | 7.28  | 8.80  |
|                      | R1-B | 3.26                     | 4.22 | 5.04 | 4.99  | 8.04  | 8.51  |
|                      | R2-A | 2.96                     | 5.37 | 5.90 | 6.13  | 5.29  | 7.28  |
|                      | R2-B | 3.09                     | 5.38 | 5.75 | 5.69  | 5.31  | 7.66  |
|                      | R3-A | 2.08                     | 4.56 | 6.38 | 6.13  | 4.81  | 7.36  |
|                      | R3-B | 3.23                     | 5.77 | 6.47 | 5.93  | 4.44  | 8.37  |
|                      | R4-A | 5.67                     | 7.57 | 8.88 | 9.50  | 8.87  | 9.51  |
|                      | R4-B | 5.73                     | 7.33 | 9.01 | 9.69  | 9.44  | 9.08  |
